# Supplementary material for: Survival and Response Outcomes for Gastrointestinal Neuroendocrine Tumor (GEP-NETs) Patients Treated with Lutetium—177-DOTATATE in a Brazilian Reference Center: A Six-Year Follow-Up Experience
Source: MDPI journal article supplement (doi:10.3390/cancers15184506), 2023-09-11
Supplement: s1 [file s1]

## Supplement

Supplementary Table S1. Ga-68 DOTA PET/CT features

| Patient | KS | SUVmax | Lowest SUV max | Range SUVmax | CH    | SUV mean | mTV     | TLSE     | Number Cycles LU 177 |
|---------|----|--------|----------------|--------------|-------|----------|---------|----------|----------------------|
| 1       | 4  | 21.2   | 5.98           | 15.22        | 0.72  | 9.55     | 457.58  | 4367.8   | 1                    |
| 2       | 4  | 26     | 12.79          | 13.21        | 0.51  | 11.76    | 525.85  | 6181.45  | 4                    |
| 3       | 3  | 14.3   | 1.86           | 12.44        | 0.87  | 2.33     | 13.57   | 31.57    | 4                    |
| 4       | 4  | 39.2   | 1.72           | 37.48        | 0.96  | 9.08     | 1191.37 | 10817.01 | 4                    |
| 5       | -  | -      | -              | -            | -     | -        | -       | -        | 4                    |
| 6       | 3  | 16.13  | 4.96           | 11.17        | 0.69  | 9        | 185.2   | 1667.47  | 3                    |
| 7       | 4  | 36.6   | 32.0           | 4.06         | 30.54 | 0.83     | 7.27    | 65.88    | 4                    |
| 8       | 4  | 34.7   | 4,19           | 30.51        | 0.88  | 3.89     | 26.13   | 101.72   | 4                    |
| 9       | 3  | 21.4   | 3.74           | 17.66        | 0.83  | 7.3      | 349.91  | 2555.83  | 4                    |
| 10      | 4  | 58.3   | 9.27           | 49.03        | 0.84  | 14.49    | 84.43   | 1223.07  | 6                    |
| 11      | 4  | 25.1   | 15.83          | 9.27         | 0.37  | 12.2     | 739     | 9016.34  | 4                    |
| 12      | 4  | 35.1   | 4.2            | 30.9         | 0.88  | 10.88    | 233.95  | 2544.84  | 5                    |
| 13      | 3  | 17.8   | 3.64           | 14.16        | 0.8   | 6.71     | 133.11  | 893.51   | 4                    |
| 14      | 4  | 25.3   | 18.37          | 6.93         | 0.27  | 12.63    | 24.33   | 307.25   | 4                    |
| 15      | 4  | 28     | 7.23           | 20.77        | 0.74  | 6.19     | 25.91   | 160.37   | 4                    |
| 16      | 4  | 21.1   | 6.8            | 14,3         | 0.68  | 7.23     | 19.05   | 137.65   | 4                    |
| 17      | 4  | -      | -              | -            | -     | -        | -       | -        | 6                    |
| 18      | 4  | 23.4   | 2.11           | 21.29        | 0.91  | 10.58    | 298.4   | 3158.41  | 3                    |
| 19      | 4  | 20.75  | 10.0           | 10.75        | 0.52  | 11.78    | 1003.05 | 11819    | 4                    |
| 20      | 4  | 66.8   | 7.31           | 59.49        | 0.89  | 9.25     | 66.37   | 614.23   | 4                    |
| 21      | 4  | 60.1   | 3.28           | 56.82        | 0.95  | 16.76    | 41.41   | 694.05   | 4                    |
| 22      | 4  | 29.4   | 3.6            | 25.8         | 0.88  | 10.85    | 1771.02 | 19209    | 4                    |
| 23      | 4  | 82.6   | 8.08           | 74.52        | 0.9   | 31.74    | 69.09   | 2193.03  | 4                    |
| 24      | 4  | 22.8   | 3.99           | 18.81        | 0.83  | 5.71     | 9.2     | 52.56    | 3                    |
| 25      | 4  | 20.3   | 7.13           | 13.17        | 0.65  | 6.54     | 33.04   | 215.95   | 4                    |
| 26      | 4  | 20.2   | 6.52           | 13.68        | 0.68  | 8        | 86.3    | 690.48   | 4                    |
| 27      | 4  | 48     | 14.36          | 33.64        | 0.7   | 13.16    | 23.38   | 307.57   | 3                    |
| 28      | 4  | 29.9   | 8.35           | 21.55        | 0.72  | 9.77     | 38.44   | 375.75   | 2                    |
| 29      | 4  | 34.9   | 8.47           | 26.43        | 0.76  | 22.03    | 48.9    | 1077.31  | 3                    |
| 30      | 4  | 66.2   | 8.64           | 57.56        | 0.87  | 20.13    | 43.8    | 881.75   | 4                    |
| 31      | 4  | 51.2   | 8.87           | 42.33        | 0.83  | 14.8     | 2063.94 | 30554.4  | 4                    |

|    |   |       |      |       |       |       |        |         |   |
|----|---|-------|------|-------|-------|-------|--------|---------|---|
| 32 | 3 | 41.3  | 4.08 | 37.22 | 0.9   | 11.89 | 221.04 | 2627.68 | 1 |
| 33 | 3 | 34.9  | 4.5  | 30.4  | 0.87  | 17.21 | 37.16  | 639.5   | 2 |
| 34 | 4 | 34.53 | -    | -     | -     | -     | -      | -       | 1 |
| 35 | 4 | 53.3  | 5.61 | 47.69 | 0.89  | 12.09 | 48.06  | 580.81  | 1 |
| 36 | 3 | 33    | 6.67 | 19    | 12.33 | 4.71  | 103.25 | 486.07  | 1 |

*Krenning scale (KS), maximum standardized uptake value among all lesions in each patient ( $SUV_{max}$ ), lowest maximum standardized uptake value among all lesions in each patient (lowest  $SUV_{max}$ ), range of  $SUV_{max}$ , heterogeneity coefficient (HC), mean standardized uptake value SUV ( $SUV_{mean}$ ), whole body molecular tumor volume (mTV), whole body total lesion somatostatin expression (TLSE).*
